# Supplementary material for: SERS combined with QuEChERS using NBC and Fe3O4 MNPs as cleanup agents to rapidly and reliably detect chlorpyrifos pesticide in citrus
Source: Royal Society of Chemistry journal article supplement (doi:10.1039/d3ay01604h), 2023-01-01
Supplement: d3ay01604h1.pdf [file d3ay01604h1.pdf]

## 1 Regents and Apparatus

Chlorpyrifos ( $\geq 99.4\%$ ) was purchased from Sigma-Aldrich Chemical (St Louis, Mo, USA). Trisodium citrate ( $\text{Na}_3\text{C}_6\text{H}_5\text{-O}_7$ ,  $\geq 99.0\%$ ), magnesium sulfate anhydrous ( $\text{MgSO}_4$ ,  $\geq 98.0\%$ ), Chloroauric acid tetrahydrate ( $\text{HAuCl}_4\cdot 4\text{H}_2\text{O}$ ,  $\text{Au} \geq 47.8\%$ ), sodium chloride ( $\text{NaCl}$ ,  $\geq 99.5\%$ ), Sodium acetate anhydrous ( $\text{C}_2\text{H}_3\text{NaO}_2$ ,  $\geq 99.0\%$ ), acetonitrile (ACE, analytical pure), were obtained from Sinopharm Chemical Reagents Co., Ltd. (Shanghai, China).  $\text{Fe}_3\text{O}_4$  magnetic nanoparticles ( $\text{Fe}_3\text{O}_4\text{MNPs}$ , 100 nm) were obtained from Hangzhou Wanjing New Material Co., Ltd (Hangzhou, China). Negative citrus samples were provided by Jiangxi Entry-Exit Inspection and Quarantine Bureau. Nano-bamboo charcoal (NBC, 100 nm) was bought from Shanghai Hainuo Carbon Industry Co., Ltd (Shanghai, China).

Raman spectrum were gathered by a RamTracer-200-HS Portable laser Raman spectrometer (Optus Opto Trace TechnoLogies, Inc), using a diode steady stimulator at 785 nm excitation wavelength with optical resolution  $< 6\text{cm}^{-1}$ , 400mW laser power, spectral scanning range of 100 ~ 3300  $\text{cm}^{-1}$ , and integration time for the collection of the spectra of 10s. Intelligent thermostatic magnetic stirrer (Yarong company, Zhengzhou, China) was applied to prepare AuNPs. AuNPs structure analysis was performed based on scanning electron microscopy (SEM; EDAX Corporation, USA), transmission electron microscope (TEM, JEOL Company, Japan) and UV-visible absorption spectroscopy (Beijing Puxi General Instrument Co., Ltd, China). Mixing of samples used a vortex mixer (Qilin Bell Instruments Co., Ltd., Haimen, China) Centrifuge (Jiawen, Instrument Equipmen, Anhui, Chinat) was used for citrus sample

processing.

Table S1 Orthogonal test-level encoding table

| levels | Factor                  |                                 |                        |
|--------|-------------------------|---------------------------------|------------------------|
|        | AuNPs ( $\mu\text{L}$ ) | Test solution ( $\mu\text{L}$ ) | NaCl concentration (%) |
| 1      | 300                     | 30                              | 0.5                    |
| 2      | 400                     | 40                              | 1.0                    |
| 3      | 500                     | 50                              | 1.5                    |
